# Supplementary material for: A novel naphthalene-pyridine Schiff base sensor for highly selective colorimetric detection of Fe 2+ , Fe 3+ , and Cu 2+ ions
Source: publisher site journal article supplement (doi:10.1515/ijcre-2024-0249), 2025-04-01
Supplement: Supplementary file 1 [file j_ijcre-2024-0249_suppl_001.docx]

**Naphthalene-pyridine Based NNO Schiff Base Ligand for Colorimetric Detection of Fe2+, Fe3+, and Cu2+**

Poonam Kaswan*1,2

poonamcym@gmail.com

1Department of Chemistry, Biochemistry, and Forensic Science, Amity School of Applied Sciences, Amity University Haryana, India, 122413

2Department of Industrial Chemistry, AISSMS’s Institute of Information Technology, Pune, Pin Code 411001, Maharashtra, India

**Figure S1.** FTIR of2-(1-(pyridin-2-ylmethylimino)ethyl) naphthalen-1-ol (PMNOL)

**Figure S2.** 1H NMR of 2-(1-(pyridin-2-ylmethylimino)ethyl)naphthalen-1-ol

**Figure S3.** 13C{1H}-NMR of 2-(1-(pyridin-2-ylmethylimino)ethyl)naphthalen-1-ol ligand


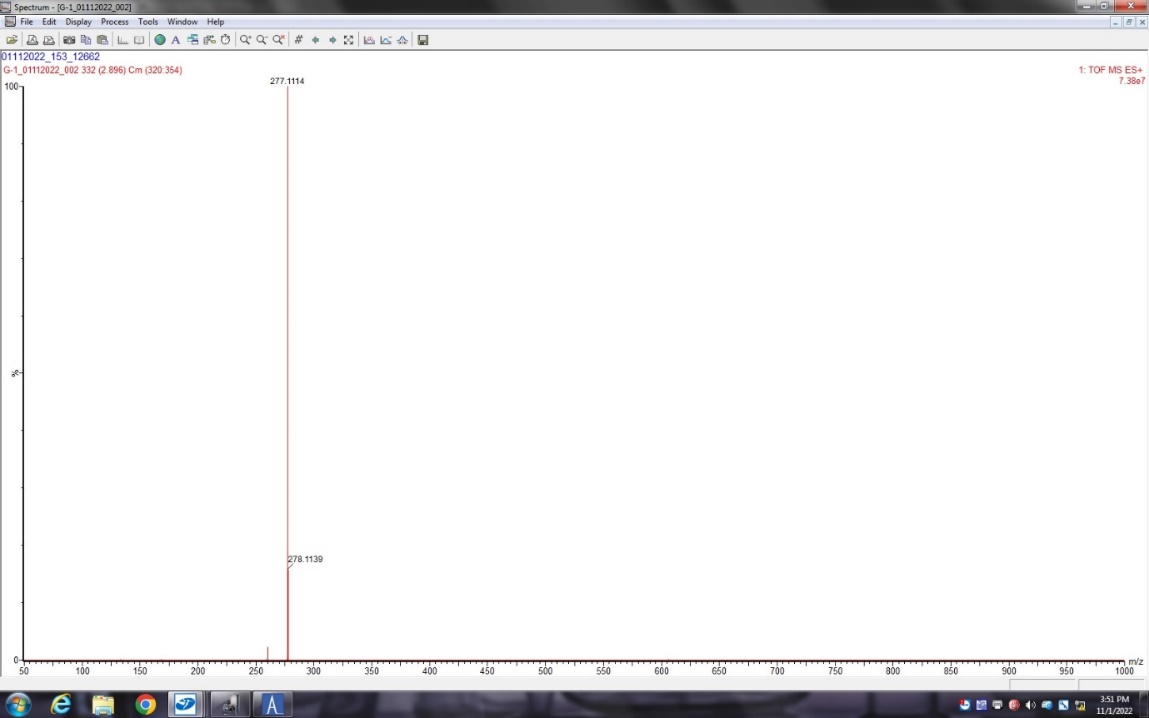


**Figure S4.** Mass spectra of 2-(1-(pyridin-2-ylmethylimino)ethyl) naphthalene-1-ol (PMNOL)
